# Supplementary material for: Conserved and divergent development of brainstem vestibular and auditory nuclei
Source: eLife journal article supplement (doi:10.7554/elife.40232), 2018-12-19
Supplement: supp [file elife-40232-supp-v1.zip]

Archive with 1 entries (1 files):
- elife_poa_e40232_Transparent_Reporting_File.pdf
